# Supplementary material
Source: PubMed Central journal article supplement (PMC7160826)
Supplement: ao9b04084_si_001.pdf [file ao9b04084_si_001.pdf]

## **Supplementary Information**

**Destruction of cell topography, morphology, membrane, inhibition of respiration, biofilm formation and bioactive molecule production by nanoparticles of Ag, ZnO, CuO, TiO<sub>2</sub> and Al<sub>2</sub>O<sub>3</sub> towards beneficial soil bacteria**

**Bilal Ahmed,\*<sup>1</sup>** Fuad Ameen<sup>2</sup>, Asfa Rizvi<sup>1</sup>, Khursheed Ali<sup>1</sup>, Hana Sonbol<sup>3</sup>, Almas Zaidi<sup>1</sup>,  
Mohammad Saghir Khan<sup>1</sup>, Javed Musarrat<sup>1,4</sup>

<sup>1</sup>Department of Agricultural Microbiology, Aligarh Muslim University, Aligarh 202002,  
India

<sup>2</sup>Department of Botany and Microbiology, College of Science, King Saud University, Riyadh  
11451, Saudi Arabia

<sup>3</sup>Department of Biology, College of Science, Princess Nourah bint Abdulrahman University,  
Riyadh, Saudi Arabia

<sup>4</sup>School of Biosciences and Biotechnology, Baba Ghulam Shah Badshah University, Rajouri,  
Jammu & Kashmir, India

### **\*Correspondence to:**

Bilal Ahmed

Nanotoxicology Laboratory,

Department of Agricultural Microbiology,

Aligarh Muslim University, Aligarh 202002, India

Email; [bilalahmed.amu@gmail.com](mailto:bilalahmed.amu@gmail.com)

**Table S1:** FTIR bond assignments of *P. mosselii* in the presence and absence of Ag-NPs and ZnO-NPs

| S. No. | IR signal (cm <sup>-1</sup> ) in the spectrum of <i>P. mosselii</i> |                            |                             | Frequency assignment                              | Reference               |
|--------|---------------------------------------------------------------------|----------------------------|-----------------------------|---------------------------------------------------|-------------------------|
|        | Control                                                             | <i>P. mosselii</i> + AgNPs | <i>P. mosselii</i> + ZnONPs |                                                   |                         |
| 1      | 3324-3437                                                           | 3319-3437                  | 3333-3442                   | O–H str of hydroxyl groups                        | Maquelin et al. (2002)  |
| 2      | 3289                                                                | 3292                       | 3289                        | N–H str (amide A) of proteins                     | Maquelin et al. (2002)  |
| 3      | 3075                                                                | 3072                       | 3079                        | N–H str (amide A) of proteins                     | Maquelin et al. (2002)  |
| 4      | 2959                                                                | 2959                       | 2961                        | C–H str (asym) of –CH <sub>3</sub> in fatty acids | Maquelin et al. (2002)  |
| 5      | 2924                                                                | 2926                       | 2926                        | C–H str (asym) of >CH <sub>2</sub>                | Maquelin et al. (2002)  |
| 6      | 2853                                                                | 2853                       | 2853                        | CH <sub>2</sub> Sym lipids                        | Movasaghi et al. 2008   |
| 7      | 1650                                                                | 1653                       | 1653                        | Amide I of beta-pleated sheet structures          | Maquelin et al. (2002)  |
| 8      | 1539                                                                | 1540                       | 1536                        | N-H def., C-H str                                 | Movasaghi et al. (2008) |
| 9      | 1442                                                                | 1445                       | 1445                        | Asy CH <sub>3</sub> bending of proteins           | Movasaghi et al. (2008) |
| 10     | 1400                                                                | 1403                       | 1405                        | Symmetric stretch of C-O of COO- groups           | Lu et al. (2011)        |
| 11     | 1308                                                                | 1314                       | 1311                        | Amide III band components of proteins             | Movasaghi et al. (2008) |
| 12     | 1235                                                                | 1235                       | 1235                        | P=O str (asym) of >PO <sub>2</sub> phosphodiester | Maquelin et al. (2002)  |
| 13     | 1066                                                                | 1058                       | 1072                        | P=O str (sym) of >PO <sub>2</sub>                 | Maquelin et al. (2002)  |
| 14     | 600-900                                                             | 600-900                    | 600-900                     | Finger Print Region                               | Maquelin et al. (2002)  |

**Table S2:** FTIR bond assignments of *A. chroococcum* in the presence and absence of Ag-NPs and ZnO-NPs

| S.<br>N | IR signal (cm <sup>-1</sup> ) in the spectrum of <i>A. chroococcum</i> |                                  |                                   | Frequency assignment                              | Reference               |
|---------|------------------------------------------------------------------------|----------------------------------|-----------------------------------|---------------------------------------------------|-------------------------|
|         | Contr<br>ol                                                            | <i>A. chroococcum</i><br>+ AgNPs | <i>A. chroococcum</i><br>+ ZnONPs |                                                   |                         |
| 1       | 3324-3439                                                              | 3319-3435                        | 3314-3425                         | O–H str of hydroxyl groups                        | Maquelin et al. (2002)  |
| 2       | 3282                                                                   | 3284                             | 3285                              | N–H str (Amide A) of proteins                     | Maquelin et al. (2002)  |
| 3       | 2956                                                                   | 2961                             | 2961                              | C–H str (asym) of –CH <sub>3</sub> in fatty acids | Maquelin et al. (2002)  |
| 4       | 2924                                                                   | 2924                             | 2924                              | C–H str (asym) of >CH <sub>2</sub>                | Maquelin et al. (2002)  |
| 5       | 2853                                                                   | 2850                             | 2855                              | CH <sub>2</sub> Sym lipids                        | Movasaghi et al. (2008) |
| 6       | 1653                                                                   | 1656                             | 1653                              | Amide I of beta-pleated sheet structures          | Maquelin et al. (2002)  |
| 7       | 1542                                                                   | 1539                             | 1539                              | N-H def., C-H str                                 | Movasaghi et al. (2008) |
| 8       | 1457                                                                   | 1454                             | 1451                              | Asy CH <sub>3</sub> bending of proteins           | Movasaghi et al. (2008) |
| 9       | 1402                                                                   | 1402                             | 1396                              | Symmetric stretch of C–O of COO- groups           | Lu et al. (2011)        |
| 10      | 1231                                                                   | 1235                             | 1235                              | P=O str (asym) of >PO <sub>2</sub> phosphodiester | Maquelin et al. (2002)  |
| 11      | 1072                                                                   | 1055                             | 1058                              | P=O str (sym) of >PO <sub>2</sub>                 | Maquelin et al. (2002)  |
| 12      | 600-900                                                                | 600-900                          | 600-900                           | Finger Print Region                               | Maquelin et al. (2002)  |

**Table S3:** Physicochemical properties of nanoparticles

| Particulars                                         | Nanoparticles                                                      |                                                        |                                          |                                                                             |                                                                                                                                       |
|-----------------------------------------------------|--------------------------------------------------------------------|--------------------------------------------------------|------------------------------------------|-----------------------------------------------------------------------------|---------------------------------------------------------------------------------------------------------------------------------------|
|                                                     | Al <sub>2</sub> O <sub>3</sub> -NPs                                | CuO-NPs                                                | TiO <sub>2</sub> -NPs                    | ZnO-NPs                                                                     | Ag-NPs                                                                                                                                |
| <sup>a</sup> Elemental composition (%)              | Al (50.6), O (49.4)                                                | Cu (76.7), O (23.3)                                    | Ti (53.2), O (46.8)                      | Zn (78.9), O (21.1)                                                         | Ag (38.01), C (2.47), N (18.88), O (33.93), Na (6.71)                                                                                 |
| <sup>b</sup> Morphology                             | Spherical to lobular to short rods of variable length and diameter | Irregular individual and aggregates with rough surface | Spherical with uniform size distribution | Pleomorphic, smaller to larger sized aggregates with some small thin sheets | Aggregates of NPs with various shapes predominantly spherical,                                                                        |
| <sup>c</sup> Crystal size (nm)                      | 28                                                                 | 18                                                     | 4.6                                      | 24                                                                          | 12                                                                                                                                    |
| <sup>d</sup> Primary size (nm)                      | 21.8±8.7                                                           | 18.4±5.5                                               | 3.9±0.9                                  | 34±10                                                                       | 13.2±9.5                                                                                                                              |
| <sup>e</sup> Secondary size (nm) in distilled water | 238±4.6                                                            | 194±5.8                                                | 148±8.4                                  | 248±11.7                                                                    | 221±12.4                                                                                                                              |
| Zeta potential (mV)                                 | +26.1±1.7                                                          | -29.8±2.1                                              | +19.2±2.3                                | -21±0.9                                                                     | +31±3.1                                                                                                                               |
| Signal in FTIR spectrum (cm <sup>-1</sup> )         | 466                                                                | 533                                                    | 541                                      | 482                                                                         | Various signals for quercetin functional groups such as -OH phenolic stretch, C-C stretches, C-H bending, C=O stretch and C-O stretch |

<sup>a</sup>Data measured by EDX; <sup>b</sup>revealed by SEM, AFM and TEM; <sup>c</sup>measured by XRD; <sup>d</sup>Determined by TEM; <sup>e</sup>Determined by DLS. In this and succeeding tables, EDX, SEM, AFM, TEM, XRD and DLS represents energy dispersive X-ray, scanning electron microscopy, atomic force microscopy, transmission electron microscopy, X-ray diffraction and dynamic light scattering, respectively; '+' and '-' indicates positive and negative, respectively ; ± represents standard deviation

**Table S4:** Time (0-24 h) dependent analysis of nanoparticle size and dissolution of metal ions in sterile nutrient broth (1X).

| Time (h)            | Concentration of NPs       | Size of NPs (nm) by DLS in nutrient broth |            | Metal ion release ( $\mu\text{g ml}^{-1}$ ) |                  | Metal ion release (%) |                  |
|---------------------|----------------------------|-------------------------------------------|------------|---------------------------------------------|------------------|-----------------------|------------------|
|                     |                            | Ag-NPs                                    | ZnO-NPs    | Ag <sup>+</sup>                             | Zn <sup>2+</sup> | Ag <sup>+</sup>       | Zn <sup>2+</sup> |
| t <sub>0</sub> (0)  | 1000 $\mu\text{g ml}^{-1}$ | 244±9                                     | 323±10.5   | 10±2                                        | 10.6±3.7         | 1.03                  | 1.06             |
| t <sub>1</sub> (3)  | 1000 $\mu\text{g ml}^{-1}$ | 267.3±12.2                                | 345±5      | 18±3                                        | 14±2             | 1.8                   | 1.43             |
| t <sub>2</sub> (6)  | 1000 $\mu\text{g ml}^{-1}$ | 286.6±6.6                                 | 339.3±8.5  | 20±7                                        | 19.3±4.7         | 2.03                  | 1.93             |
| t <sub>3</sub> (12) | 1000 $\mu\text{g ml}^{-1}$ | 278.6±3.7                                 | 337.6±15.2 | 31±10                                       | 20±5.8           | 3.13                  | 2.06             |
| t <sub>4</sub> (24) | 1000 $\mu\text{g ml}^{-1}$ | 297.3±12                                  | 352±4      | 39±8.5                                      | 26.3±5           | 3.93                  | 2.63             |

**Table S5:** Bacterial cultures used in the present study

| S. No. | Accession Number    | Taxonomic designation                                        | Source              | Plant growth promoting traits                             |
|--------|---------------------|--------------------------------------------------------------|---------------------|-----------------------------------------------------------|
| 1.     | ATCC 9043, 2351 (T) | <i>Azotobacter chroococcum</i> Beijerinck 1901 (Type strain) | Soil                | N <sub>2</sub> fixation, L-carnitine production           |
| 2.     | 2095                | <i>Bacillus thuringiensis</i>                                | Soybean rhizosphere | Zinc solubilization                                       |
| 3.     | 2126                | <i>Pseudomonas mosselii</i>                                  | Soybean rhizosphere | Zinc solubilization, siderophore production               |
| 4.     | NAIMCC-B-00863      | <i>Sinorhizobium meliloti</i>                                | Not mentioned       | Symbiotic N <sub>2</sub> fixer ( <i>Medicago sativa</i> ) |

**Table S6:** Scheme of bacterial growth under the influence of varying concentrations of NPs

| NPs Used | Treatment ( $\mu\text{g ml}^{-1}$ ) (i) |      |      |      | Treatment (ii) |   |   |   | Treatment ( $\mu\text{g ml}^{-1}$ ) (iii) |
|----------|-----------------------------------------|------|------|------|----------------|---|---|---|-------------------------------------------|
|          | A                                       | B    | P    | S    | A              | B | P | S |                                           |
| Ag-NPs   | 125                                     | 125  | 125  | 125  | -              | - | - | - | 125                                       |
|          | 250                                     | 250  | 250  | 250  | -              | - | - | - | 250                                       |
|          | 500                                     | 500  | 500  | 500  | -              | - | - | - | 500                                       |
|          | 1000                                    | 1000 | 1000 | 1000 | -              | - | - | - | 1000                                      |
| ZnO-NPs  | 125                                     | 125  | 125  | 125  | -              | - | - | - | 125                                       |
|          | 250                                     | 250  | 250  | 250  | -              | - | - | - | 250                                       |
|          | 500                                     | 500  | 500  | 500  | -              | - | - | - | 500                                       |
|          | 1000                                    | 1000 | 1000 | 1000 | -              | - | - | - | 1000                                      |

A= *A. chroococcum*; B= *B. thuringiensis*; P= *P. mosselii*; S= *S. meliloti*. Each individual experiment was replicated three times

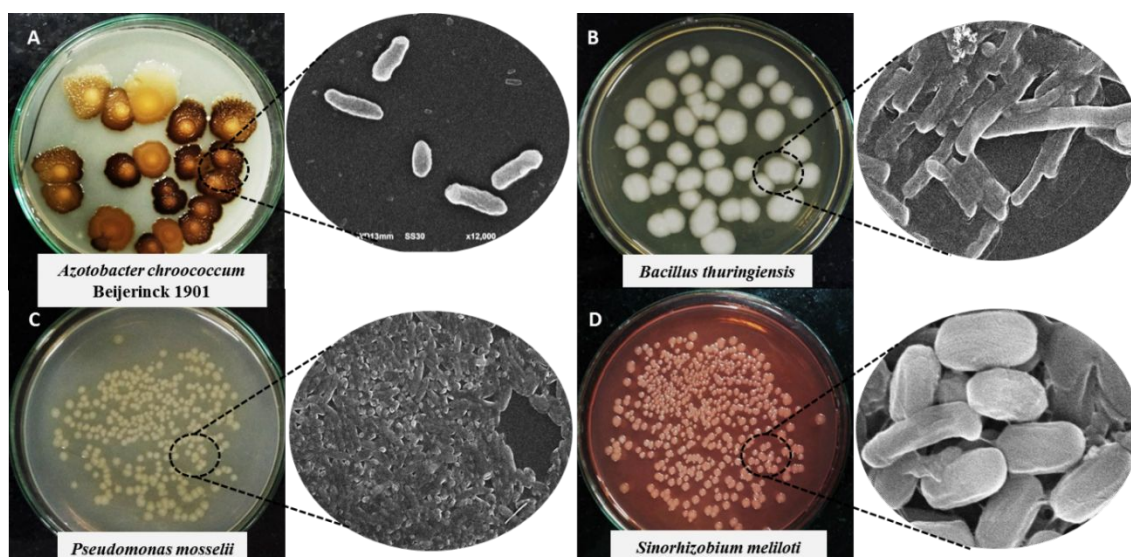

**Figure S1.** Colonial characteristics of beneficial soil bacteria used in this study. A: *A. chroococcum*; B: *B. thuringiensis*; C: *P. mosselii*; and D: *S. meliloti*.

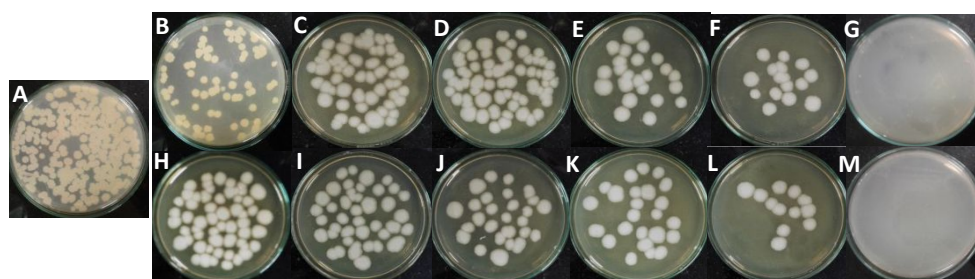

**Figure S2.** Concentration dependent inhibition of cell viability of *B. thuringiensis* by NPs: control (A), 62.5 (B), 125 (C), 250 (D), 500 (E), 1000 (F), 1500 (G)  $\mu\text{gAgNPs ml}^{-1}$ ; 62.5 (H), 125 (I), 250 (J), 500 (K), 1000 (L) and 1500 (M)  $\mu\text{gZnONPs ml}^{-1}$ .

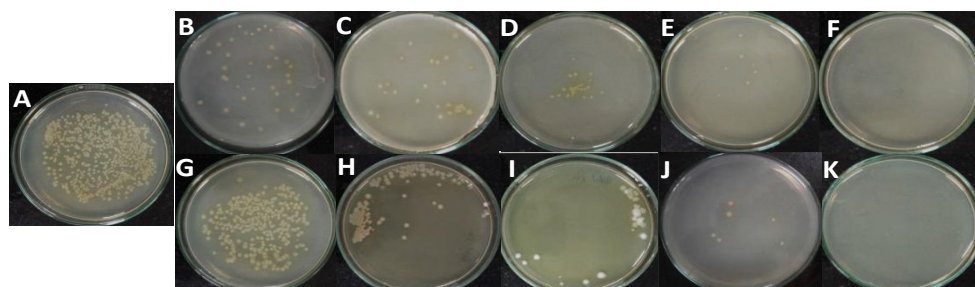

**Figure S3.** Concentration dependent inhibition of cell viability of *P. mosselii* by NPs: control (A), 62.5 (B), 125 (C), 250 (D), 500 (E) and 1000 (F)  $\mu\text{gAgNPs ml}^{-1}$ ; 62.5 (G), 125 (H), 250 (I), 500 (J) and 1000 (K)  $\mu\text{gZnONPs ml}^{-1}$ .

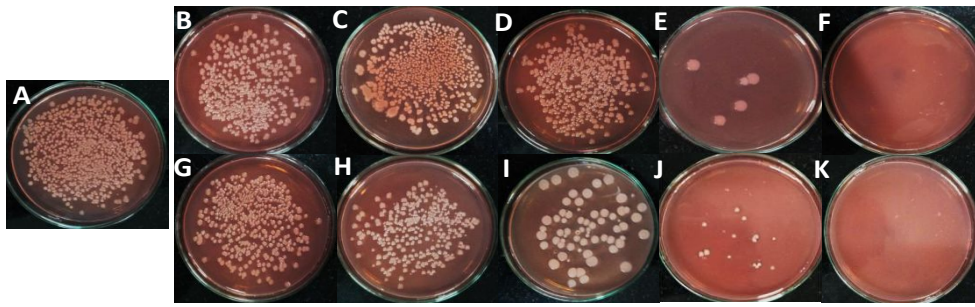

**Figure S4.** Concentration dependent inhibition of cell viability of *S. meliloti* by NPs: control (A), 62.5 (B), 125 (C), 250 (D), 500 (E) and 1000 (F)  $\mu\text{gAgNPs ml}^{-1}$ ; 62.5 (G), 125 (H), 250 (I), 500 (J) and 1000 (K)  $\mu\text{gZnONPs ml}^{-1}$ .

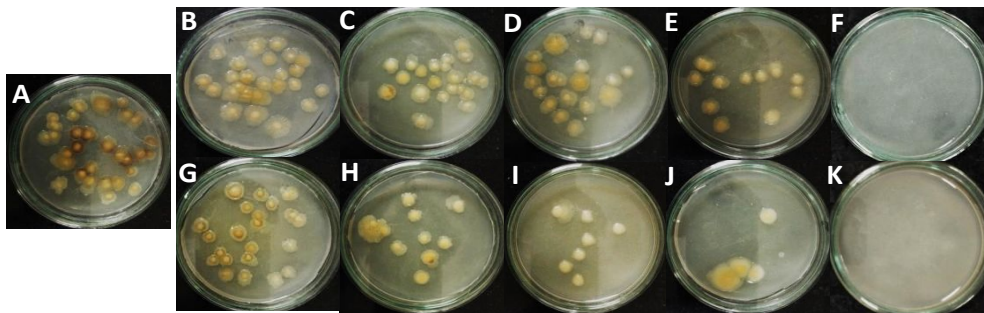

**Figure S5.** Concentration dependent inhibition of cell viability of *A. chroococcum* by NPs: control (A), 62.5 (B), 125 (C), 250 (D), 500 (E) and 1000 (F)  $\mu\text{gAgNPs ml}^{-1}$ ; 62.5 (G), 125 (H), 250 (I), 500 (J) and 1000 (K)  $\mu\text{gZnONPs ml}^{-1}$ .

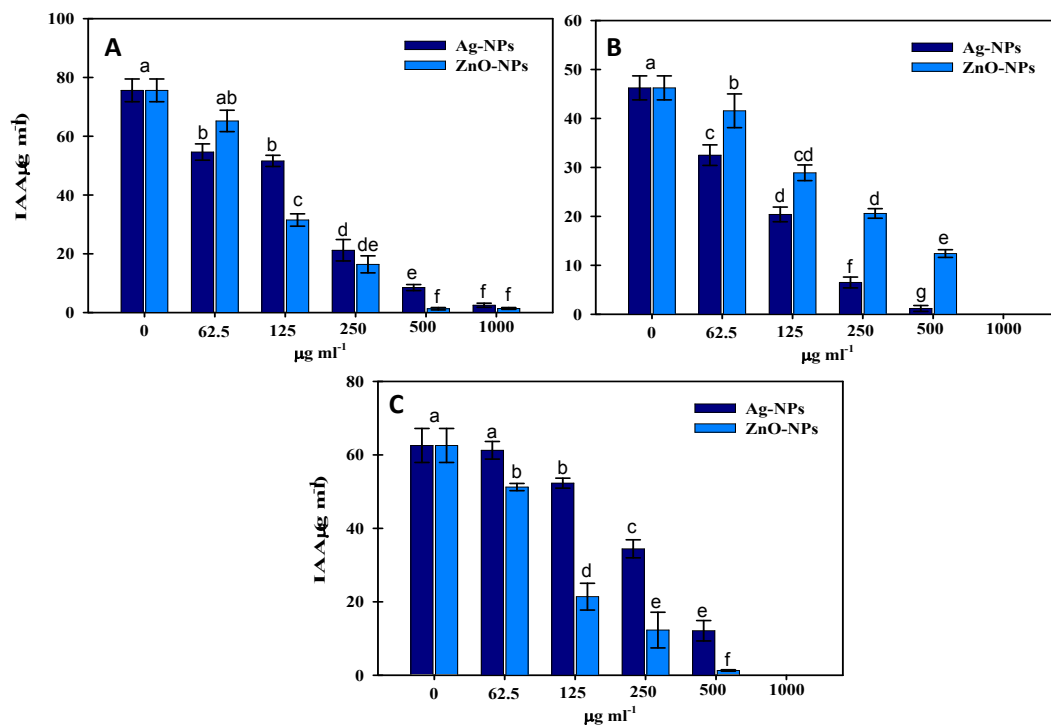

**Figure S6.** Bioassay of indole acetic acid (IAA) secretion by *P. mosselii* (A), *S. meliloti* (B) and *A. chroococcum* (C) grown in LB broth treated with 62.5-1000  $\mu\text{g ml}^{-1}$  each of Ag-NPs and ZnO-NPs. Different letters on bars denotes significant difference ( $P \leq 0.05$ ) according to DMRT.



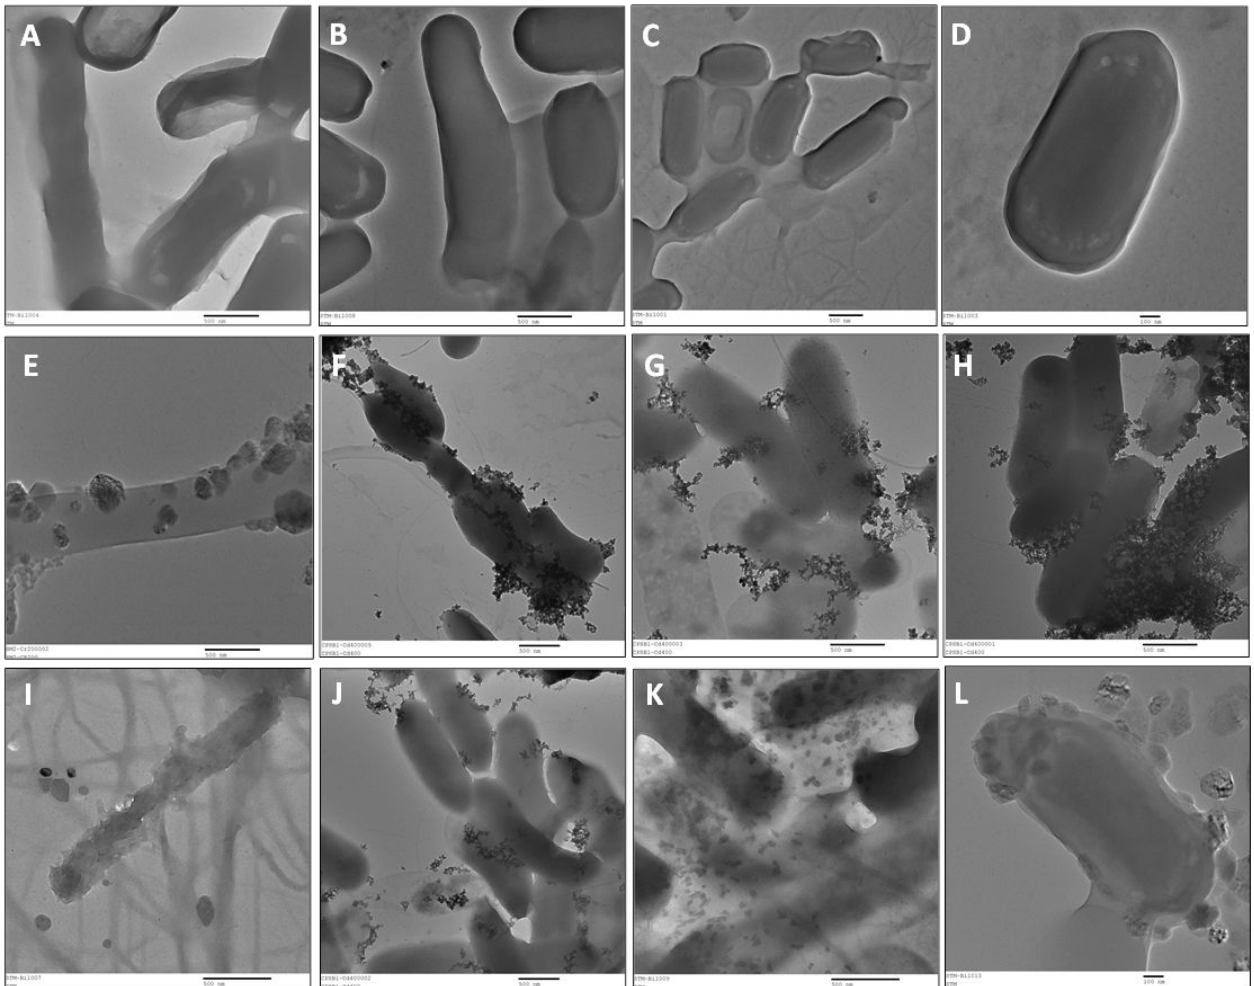

**Figure S7.** Transmission electron micrographs of bacterial strains; control cells of *B. thuringiensis* (A), *P. mosselii* (B), *S. meliloti* (C) and *A. chroococcum* (D), *B. thuringiensis*+1000  $\mu\text{gAg-NPs ml}^{-1}$  (E), *P. mosselii*+500  $\mu\text{gAg-NPs ml}^{-1}$  (F), *S. meliloti*+250  $\mu\text{gAg-NPs ml}^{-1}$  (G), *A. chroococcum*+500  $\mu\text{gAg-NPs ml}^{-1}$  (H), *B. thuringiensis*+1000  $\mu\text{gZnO-NPs ml}^{-1}$  (I), *P. mosselii*+500  $\mu\text{gZnO-NPs ml}^{-1}$  (J), *S. meliloti*+250  $\mu\text{gZnO-NPs ml}^{-1}$  (K) and *A. chroococcum*+500  $\mu\text{gZnO-NPs ml}^{-1}$  (L).



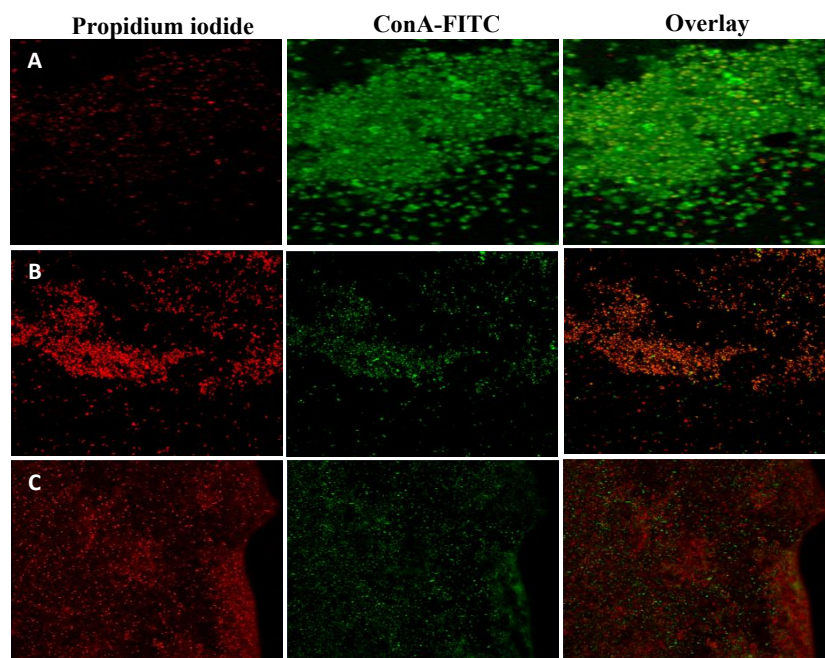

**Figure S8.** CLSM images (at 400X) of *B. thuringiensis* biofilm. Panel A represents untreated biofilm of *B. thuringiensis*. Red fluorescence depicts propidium iodide stained bacterial cells while green fluorescence of ConA-FITC indicates the presence of EPS. Panels B and C represent CLSM images of *B. thuringiensis* biofilm observed at  $1000 \mu\text{g ml}^{-1}$  each of Ag-NPs (B) and ZnO-NPs (C).

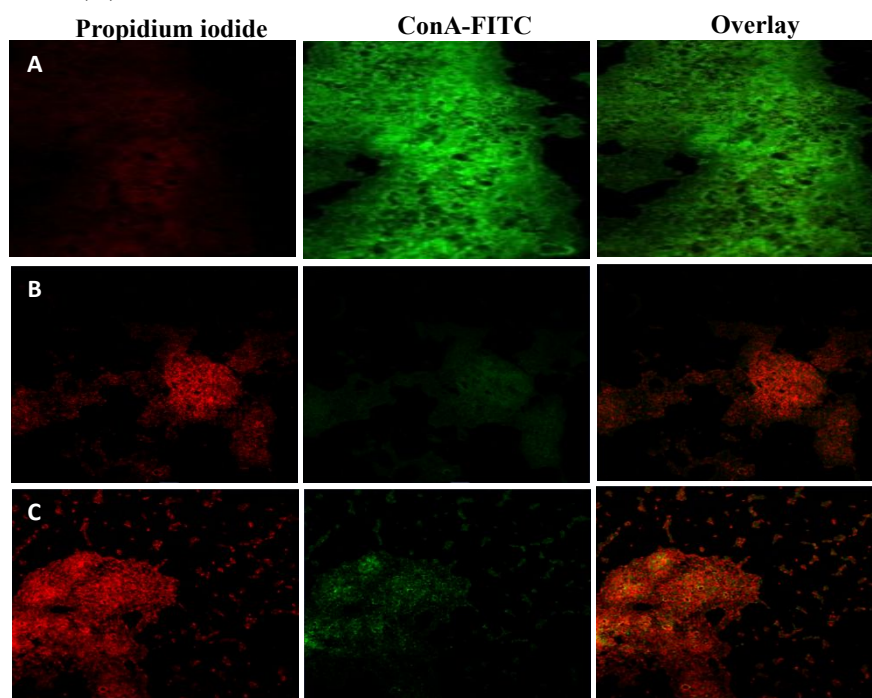

**Figure S9.** CLSM images (at 400X) of *P. mosselii* biofilm. Panel A represents untreated biofilm of *P. mosselii*. Red fluorescence depicts propidium iodide stained bacterial cells while green fluorescence of ConA-FITC indicates the presence of EPS. Panels B and C represent CLSM images of *B. thuringiensis* biofilm observed at  $500 \mu\text{g ml}^{-1}$  each of Ag-NPs (B) and ZnO-NPs (C).

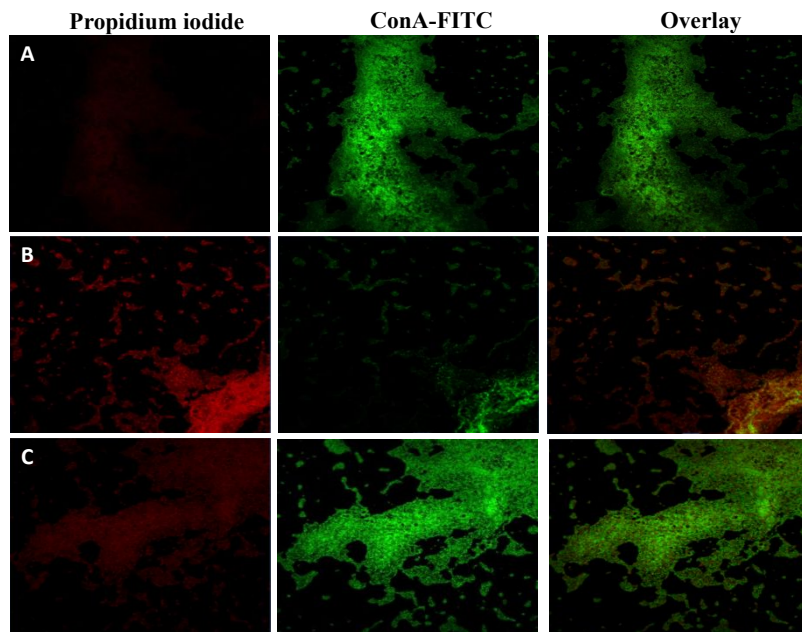

**Figure S10.** CLSM images (at 400X) of *S. meliloti* biofilm. Panel A represents untreated biofilm of *S. meliloti*. Red fluorescence depicts propidium iodide stained bacterial cells while green fluorescence of ConA-FITC indicates the presence of EPS. Panels B and C represent CLSM images of *B. thuringiensis* biofilm observed at  $500 \mu\text{g ml}^{-1}$  each of Ag-NPs (B) and ZnO-NPs (C).

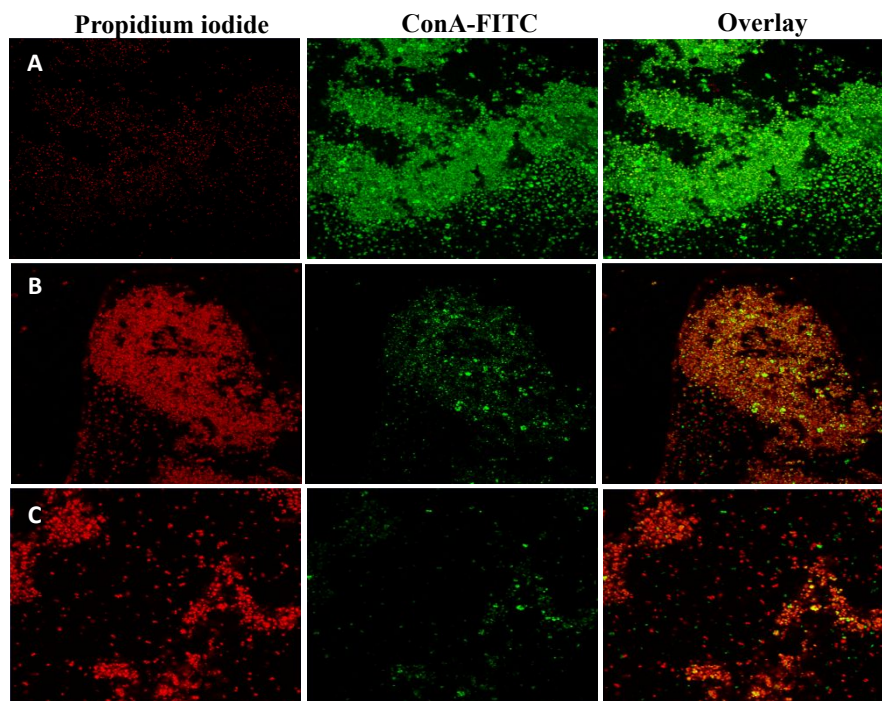

**Figure S11.** CLSM images (at 400X) of *A. chroococcum* biofilm. Panel A represents untreated biofilm of *A. chroococcum*. Red fluorescence depicts propidium iodide stained bacterial cells while green fluorescence of ConA-FITC indicates the presence of EPS. Panels B and C represent CLSM images of *B. thuringiensis* biofilm observed at  $500 \mu\text{g ml}^{-1}$  each of Ag-NPs (B) and ZnO-NPs (C).

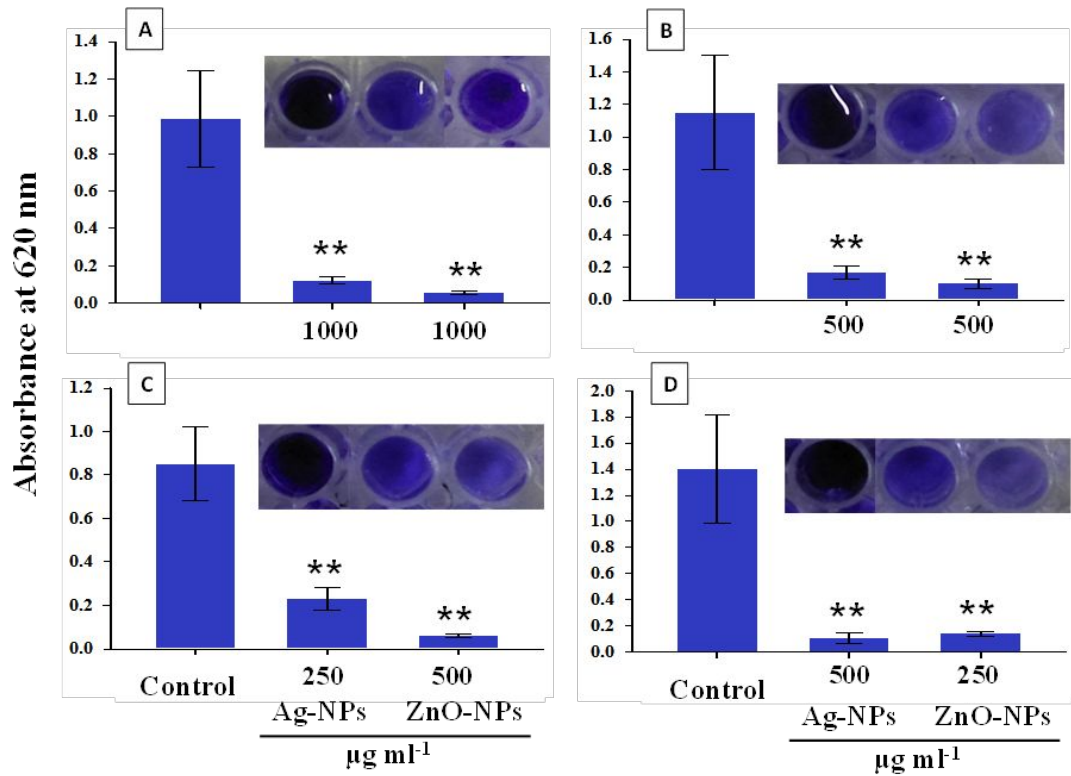

**Figure S12.** Bar diagrams (A-D) represents the absorbance of crystal violet retained by cells of *B. thuringiensis* (A), *P. mosselii* (B), *S. meliloti* (C) and *A. chroococcum* (D) after NPs exposure. Asterisks indicate significant difference at  $**P < 0.001$ .

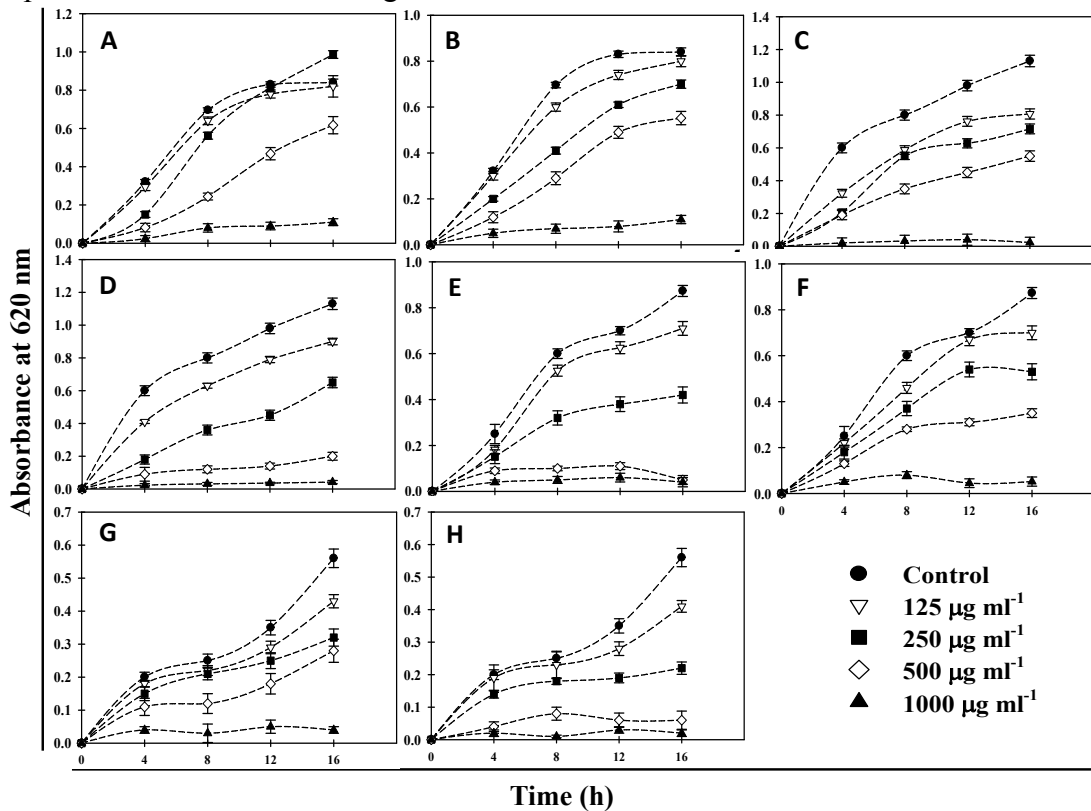

**Figure S13.** Time (0-16 h) and concentration (125–1000  $\mu\text{g ml}^{-1}$ ) dependent growth inhibition of bacterial strains. A: *B. thuringiensis*+Ag-NPs, B: *B. thuringiensis*+ZnO-NPs, C: *P.*

*mosselii*+Ag-NPs, D: *P. mosselii*+ZnO-NPs, E: *S. meliloti*+Ag-NPs, F: *S. meliloti*+ZnO-NPs, G: *A. chroococcum*+Ag-NPs and H: *A. chroococcum*+ZnO-NPs.

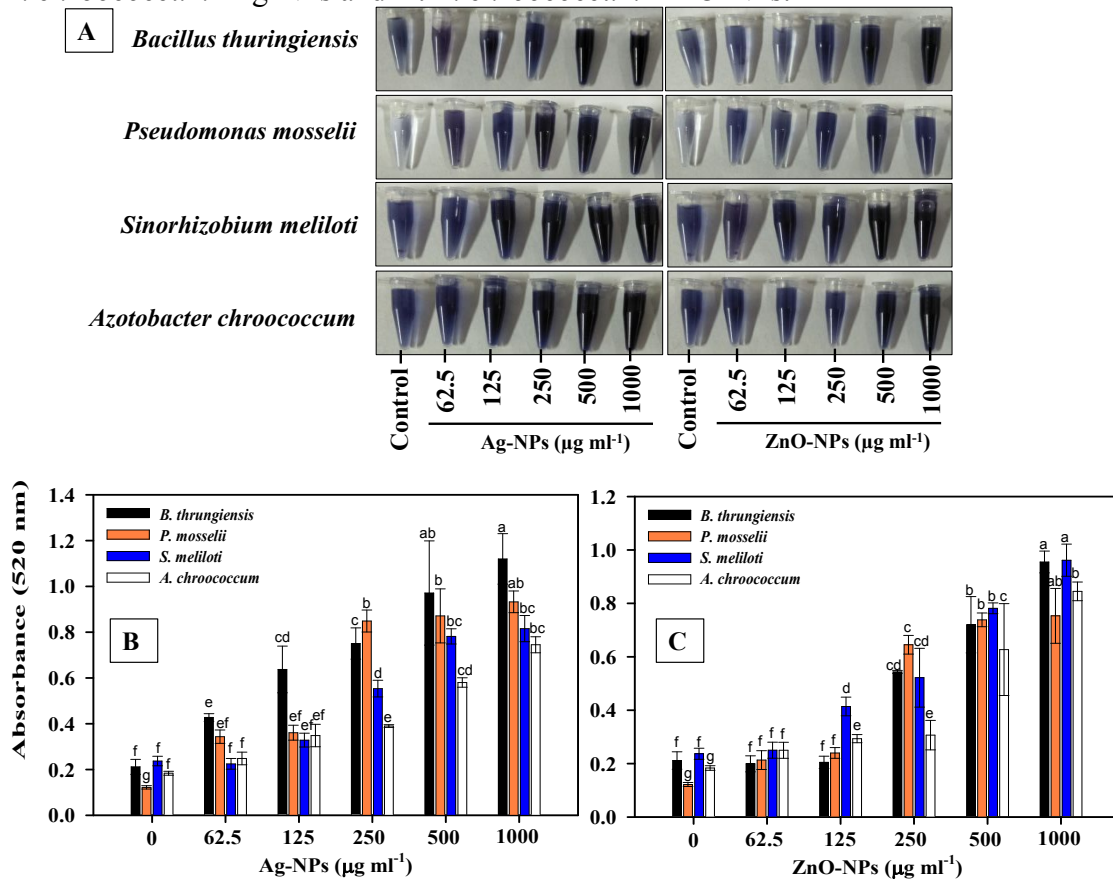

**Figure S14.** NBT staining of bacterial cells under NPs stress: Intracellular development of blue color formazan by *B. thuringiensis*, *P. mosselii*, *S. meliloti* and *A. chroococcum* under varying concentrations (62.5-1000 µg ml<sup>-1</sup>) of Ag-NPs and ZnO-NPs. Panel A represents generation of superoxide radicals while Panels B and C show spectrophotometric quantification of superoxide radicals generated by Ag-NPs (B) and ZnO-NPs (C). Different letters on bars denotes significant difference at P≤0.05 according to DMRT.
